# Supplementary material for: Genomics of soil depth niche partitioning in the Thaumarchaeota family Gagatemarchaeaceae
Source: PubMed Central journal article supplement (PMC10640624; doi:10.1038/s41467-023-43196-0), 2023-11-11
Supplement: 41467_2023_43196_MOESM3_ESM.pdf [file 41467_2023_43196_MOESM3_ESM.pdf]

|                              |                                                                                                  |
|------------------------------|--------------------------------------------------------------------------------------------------|
| <b>Supplementary Data 1</b>  | Genome descriptions and characteristics                                                          |
| <b>Supplementary Data 2</b>  | Pairwise comparison of average amino acid identity of Thaumarchaeota and closely related genomes |
| <b>Supplementary Data 3</b>  | Pairwise comparison of 16S rRNA gene similarity of Thaumarchaeota and closely related genomes    |
| <b>Supplementary Data 4</b>  | Presence of Group I.1c in >150,000 16S rRNA libraries                                            |
| <b>Supplementary Data 5</b>  | Presence of topsoil and subsoil Group I.1c lineages in >150,000 16S rRNA libraries               |
| <b>Supplementary Data 6</b>  | Sites sampled for metagenomic sequencing                                                         |
| <b>Supplementary Data 7</b>  | Competitive read recruitment of metagenomic reads against Group I.1c genomes                     |
| <b>Supplementary Data 8</b>  | Vico Oton Group I.1c 16S rRNA gene classification of Gagatemarkarchaeaceae genomes               |
| <b>Supplementary Data 9</b>  | Group I.1c genomes as type material for reclassification                                         |
| <b>Supplementary Data 10</b> | Key pathways in Thaumarchaeota genomes                                                           |
| <b>Supplementary Data 11</b> | Synteny analysis of genes surrounding rbcL, using AcS1-13 gene order as the reference            |
| <b>Supplementary Data 12</b> | Total carbohydrate active enzymes (CAZymes) of the Thaumarchaeota                                |
| <b>Supplementary Data 13</b> | Secreted carbohydrate active enzymes (CAZymes) of the Thaumarchaeota                             |
| <b>Supplementary Data 14</b> | Total peptidases of the Thaumarchaeota                                                           |
| <b>Supplementary Data 15</b> | Secreted peptidases of the Thaumarchaeota                                                        |
| <b>Supplementary Data 16</b> | Reconciliation statistics of F420-dependent glucose-6-phosphate dehydrogenase gene family        |
| <b>Supplementary Data 17</b> | GenBank accessions of expanded inter-domain set of prokaryotic genomes                           |
| <b>Supplementary Data 18</b> | Locus tags of pyrroloquinoline quinone-dependent dehydrogenases                                  |
| <b>Supplementary Data 19</b> | Quantified mechanisms of gene content change                                                     |
| <b>Supplementary Data 20</b> | Duplication and loss of gene families originating in Gagatemarkarchaeaceae LCA                   |
| <b>Supplementary Data 21</b> | Major donors of laterally acquired genes into Gagatemarkarchaeaceae LCA                          |
| <b>Supplementary Data 22</b> | Genomes present in each of the three genome datasets                                             |
